# Supplementary material for: Gas permeability, mechanical behaviour and compostability of fully-aliphatic bio-based multiblock poly(ester urethane)s
Source: Royal Society of Chemistry journal article supplement (doi:10.1039/c6ra08882a), 2016-01-01
Supplement: c6ra08882a1.pdf [file c6ra08882a1.pdf]

### SUPPORTING INFORMATION

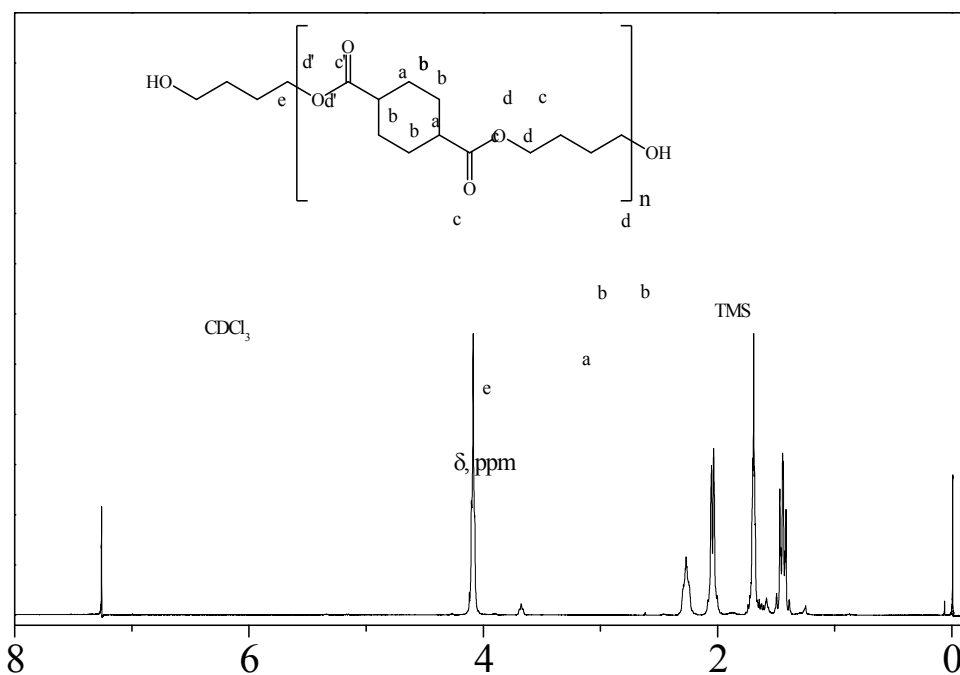

**Figure S1.** <sup>1</sup>H-NMR spectrum of PBCE-OH with resonance assignments.

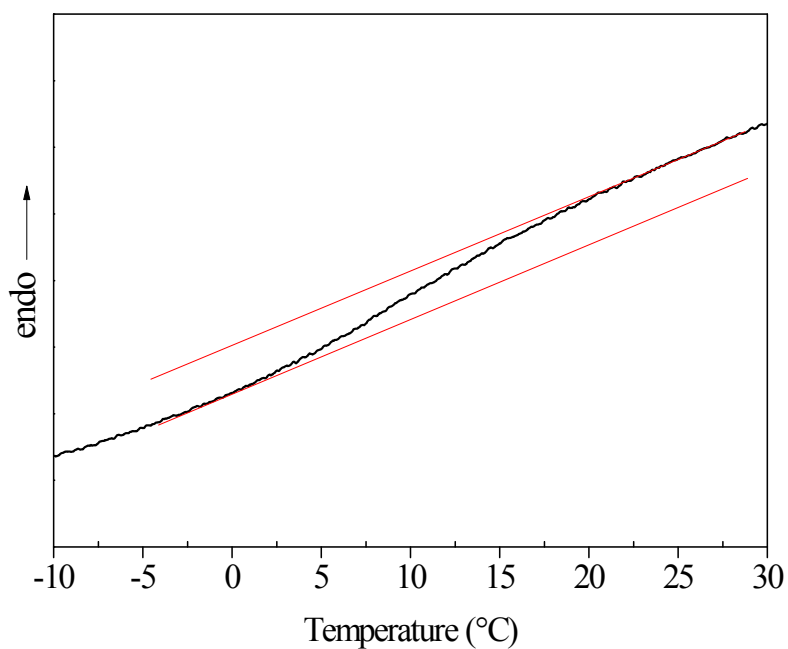

**Figure S2.** Calorimetric curve of PBCE in the region -10 to 30°C to visualize the glass transition. Red lines serve as eye guides to highlight the phenomenon.

**Table S1.** Thermal characterization data (II scan DSC after quenching from the melt).

| <i>Polymer</i> | <b>II scan, DSC</b>          |                                   |                                |                                  |                                |                                  |
|----------------|------------------------------|-----------------------------------|--------------------------------|----------------------------------|--------------------------------|----------------------------------|
|                | <b>T<sub>g</sub></b><br>(°C) | <b>ΔC<sub>p</sub></b><br>(J/°C g) | <b>T<sub>m,1</sub></b><br>(°C) | <b>ΔH<sub>m,1</sub></b><br>(J/g) | <b>T<sub>m,2</sub></b><br>(°C) | <b>ΔH<sub>m,2</sub></b><br>(J/g) |
| <i>PBCE</i>    | 9                            | 0.141                             | -                              | -                                | 166                            | 33                               |
| <i>A50B50</i>  | -34                          | 0.330                             | 52                             | 3                                | 143                            | 13                               |
| <i>A30B70</i>  | -31                          | 0.389                             | 64                             | 16                               | 134                            | 8                                |
| <i>A50C50</i>  | -29                          | 0.440                             | -                              | -                                | 119                            | 17                               |
| <i>A30C70</i>  | -32                          | 0.451                             | 51                             | 2                                | 110                            | 4                                |

**Table S2.** Degree of crystallinity as a function of the composting time.

| <i>Polymer</i> | <b>X<sub>c</sub> (%)</b> |             |             |
|----------------|--------------------------|-------------|-------------|
|                | <b>0 d</b>               | <b>56 d</b> | <b>84 d</b> |
| <i>PBCE</i>    | 38                       | 39          | 41          |
| <i>A50B50</i>  | 28                       | 38          | 41          |
| <i>A30B70</i>  | 26                       | 37          | 40          |
| <i>A50C50</i>  | 26                       | 43          | 45          |
| <i>A30C70</i>  | 24                       | 40          | 44          |

| <i>Polymer</i>                                  | <i>PBCE</i> | <i>A50B50</i>                             | <i>A30B70</i>                           | <i>A50C50</i>                           | <i>A30C70</i>                             |
|-------------------------------------------------|-------------|-------------------------------------------|-----------------------------------------|-----------------------------------------|-------------------------------------------|
| <b>Thickness (μm)</b>                           | 146±14      | 241±13                                    | 163±3                                   | 262±8                                   | 263±29                                    |
| <b>8°C</b>                                      |             |                                           |                                         |                                         |                                           |
| <b>GTR (cm<sup>3</sup>/m<sup>2</sup> d bar)</b> | 157 ± 1     | 341 ± 2                                   | 329 ± 2                                 | 226 ± 1                                 | 604 ± 1                                   |
| <b>S (cm<sup>3</sup>/cm<sup>2</sup> bar)</b>    |             | 1.2E <sup>-02</sup> ± 3.4E <sup>-03</sup> |                                         |                                         | 2.7E <sup>-01</sup> ± 9.4E <sup>-03</sup> |
| <b>D (cm<sup>2</sup>/s)</b>                     |             | 9.7E <sup>-07</sup> ± 2.7E <sup>-7</sup>  |                                         |                                         | 4.2E <sup>-08</sup> ± 1.4E <sup>-9</sup>  |
| <b>t<sub>L</sub> (s)</b>                        |             | 128 ± 37                                  |                                         |                                         | 1066 ± 35                                 |
| <b>15°C</b>                                     |             |                                           |                                         |                                         |                                           |
| <b>GTR (cm<sup>3</sup>/m<sup>2</sup> d bar)</b> | 160 ± 1     | 1113 ± 2                                  | 1026 ± 4                                | 776 ± 2                                 | 1070 ± 1                                  |
| <b>S (cm<sup>3</sup>/cm<sup>2</sup> bar)</b>    |             | 1.1E <sup>0</sup> ± 5E <sup>-03</sup>     | 1.4E <sup>0</sup> ± 5E <sup>-03</sup>   | 3.8 <sup>-01</sup> ± 2E <sup>-03</sup>  | 1.4E <sup>0</sup> ± 5E <sup>-03</sup>     |
| <b>D (cm<sup>2</sup>/s)</b>                     |             | 3.0E <sup>-08</sup> ± 8E <sup>-11</sup>   | 3.9E <sup>-08</sup> ± 7E <sup>-10</sup> | 5.8E <sup>-08</sup> ± 3E <sup>-10</sup> | 1.4E <sup>-08</sup> ± 5E <sup>-11</sup>   |

|                                 |                                         |                                         |                                        |                                         |                                         |
|---------------------------------|-----------------------------------------|-----------------------------------------|----------------------------------------|-----------------------------------------|-----------------------------------------|
| $t_L$ (s)                       |                                         | 128 ± 37                                | 3000 ± 57                              | 1678 ± 7                                | 3080 ± 6                                |
| <b>23°C</b>                     |                                         |                                         |                                        |                                         |                                         |
| <b>GTR</b> ( $cm^3/m^2 d bar$ ) | 659 ± 2                                 | 2627 ± 5                                | 2263 ± 5                               | 2480 ± 8                                | 2473 ± 5                                |
| <b>S</b> ( $cm^3/cm^2 bar$ )    | 1.2E <sup>0</sup> ± 1E <sup>-02</sup>   | 1.2E <sup>0</sup> ± 5E <sup>-03</sup>   | 1.3E <sup>0</sup> ± 5E <sup>-03</sup>  | 1.3E <sup>0</sup> ± 8E <sup>-03</sup>   | 1.4E <sup>0</sup> ± 3E <sup>-02</sup>   |
| <b>D</b> ( $cm^2/s$ )           | 9.3E <sup>-09</sup> ± 8E <sup>-11</sup> | 6.7E <sup>-08</sup> ± 1E <sup>-10</sup> | 5.4E <sup>-08</sup> ± 2E <sup>-1</sup> | 5.5E <sup>-08</sup> ± 3E <sup>-10</sup> | 3.2E <sup>-08</sup> ± 7E <sup>-10</sup> |
| $t_L$ (s)                       | 3810 ± 34                               | 1716 ± 3                                | 2126 ± 6                               | 1775 ± 11                               | 1369 ± 30                               |

**Table S3.** Permeability data of CO<sub>2</sub> gas at 8, 15 and 23°C and film thickness.

**Table S4.** Perm-selectivity values at 8,15 and 23°C.

| <i>Polymer</i> | CO <sub>2</sub> /O <sub>2</sub> | CO <sub>2</sub> /N <sub>2</sub> | CO <sub>2</sub> /C <sub>2</sub> H <sub>4</sub> | CO <sub>2</sub> /O <sub>2</sub> | CO <sub>2</sub> /N <sub>2</sub> | CO <sub>2</sub> /C <sub>2</sub> H <sub>4</sub> | CO <sub>2</sub> /O <sub>2</sub> | CO <sub>2</sub> /N <sub>2</sub> | CO <sub>2</sub> /C <sub>2</sub> H <sub>4</sub> |
|----------------|---------------------------------|---------------------------------|------------------------------------------------|---------------------------------|---------------------------------|------------------------------------------------|---------------------------------|---------------------------------|------------------------------------------------|
|                | 8°C                             |                                 |                                                | 15°C                            |                                 |                                                | 23°C                            |                                 |                                                |
| <i>PBCE</i>    | 1.01                            | 1.57                            | 2.41                                           | 1.01                            | 1.62                            | 0.92                                           | 1.49                            | 7.42                            | 4.20                                           |
| <i>A50B50</i>  | 2.19                            | 2.46                            | 2.11                                           | 4.12                            | 9.41                            | 8.45                                           | 5.47                            | 12.83                           | 7.67                                           |
| <i>A30B70</i>  | 3.06                            | 4.93                            | 3.40                                           | 5.31                            | 8.82                            | 7.45                                           | 7.12                            | 10.76                           | 5.24                                           |
| <i>A50C50</i>  | 0.94                            | 1.74                            | 1.51                                           | 3.39                            | 6.83                            | 4.91                                           | 4.63                            | 11.92                           | 5.65                                           |
| <i>A30C70</i>  | 3.06                            | 4.93                            | 3.40                                           | 5.31                            | 8.82                            | 7.45                                           | 5.30                            | 13.97                           | 7.09                                           |

**Table S5.** Activation energy for the gas transmission rate ( $E_{GTR}$ ), the Heat of Solution ( $H_S$ ) and the Diffusion ( $E_D$ ) process at 8, 15 and 23°C. In the brackets the linear regression coefficients ( $R^2$ ).

| <i>Polymer</i> | $E_{GTR}$<br>(J/mol) | $H_S$<br>(J/mol)  | $E_D$<br>(J/mol)  | $E_{GTR}$<br>(J/mol)              | $H_S$<br>(J/mol)    | $E_D$<br>(J/mol)     |
|----------------|----------------------|-------------------|-------------------|-----------------------------------|---------------------|----------------------|
|                | <b>O<sub>2</sub></b> |                   |                   | <b>CO<sub>2</sub></b>             |                     |                      |
| <i>PBCE</i>    | 48 ± 0.16<br>(0.8)   | -                 | --                | 66 ± 0.11<br>(0.8)                | --                  | --                   |
| <i>A50B50</i>  | 52 ± 0.16<br>(1)     | --                | --                | 94 ± 0.13<br>(1)                  | 211 ± 0.18<br>(0.7) | -121 ±<br>0.13 (0.5) |
| <i>A30B70</i>  | -6 ± 0.22<br>(0.2)   | 116 ± 0.24<br>(1) | 100 ± 0.13<br>(1) | 89 ± 0.10<br>(1)                  | -9 ± 0.07<br>(1)    | 30 ± 0.03<br>(1)     |
| <i>A50C50</i>  | 37 ± 0.10<br>(0.7)   | --                | --                | 111 ± 0.19<br>(1)                 | 108 ± 0.15<br>(1)   | -5 ± 0.20<br>(1)     |
| <i>A30C70</i>  | 40 ± 0.21<br>(0.8)   | --                | --                | 65 ± 0.22<br>(1)                  | 76 ± 0.19<br>(1)    | -10 ± 0.22<br>(0.0)  |
|                | <b>N<sub>2</sub></b> |                   |                   | <b>C<sub>2</sub>H<sub>4</sub></b> |                     |                      |
| <i>PBCE</i>    | -6 ± 0.11            |                   |                   | 39 ± 0.20                         |                     |                      |

|                      |                    |    |    |                    |    |    |
|----------------------|--------------------|----|----|--------------------|----|----|
|                      | (0.8)              |    |    | (0.6)              |    |    |
| <b><i>A50B50</i></b> | 19 ± 0.10<br>(0.5) | -- | -- | 35 ± 0.05<br>(0.6) | -- | -- |
| <b><i>A30B70</i></b> | 10 ± 0.13<br>(0.2) | -- | -- | 67 ± 0.21<br>(1)   | -- | -- |
| <b><i>A50C50</i></b> | 22 ± 0.28<br>(0.6) | -- | -- | 50 ± 0.12<br>(0.8) | -- | -- |
| <b><i>A30C70</i></b> | 17 ± 0.12<br>(0.8) | -- | -- | 32 ± 0.03<br>(0.6) | -- | -- |
